# Supplementary material
Source: PubMed Central journal article supplement (PMC8753435)
Supplement: mmc1.pdf [file mmc1.pdf]

## **Supplemental Information**

### **COVID-eVax, an electroporated DNA vaccine candidate encoding the SARS-CoV-2 RBD, elicits protective responses in animal models**

**Antonella Conforti, Emanuele Marra, Fabio Palombo, Giuseppe Roscilli, Micol Ravà, Valeria Fumagalli, Alessia Muzi, Mariano Maffei, Laura Luberto, Lucia Lione, Erika Salvatori, Mirco Compagnone, Eleonora Pinto, Emiliano Pavoni, Federica Bucci, Grazia Vitagliano, Daniela Stoppoloni, Maria Lucrezia Pacello, Manuela Cappelletti, Fabiana Fosca Ferrara, Emanuela D'Acunto, Valerio Chiarini, Roberto Arriga, Abraham Nyska, Pietro Di Lucia, Davide Marotta, Elisa Bono, Leonardo Giustini, Eleonora Sala, Chiara Perucchini, Jemma Paterson, Kathryn Ann Ryan, Amy-Rose Challis, Giulia Matusali, Francesca Colavita, Gianfranco Caselli, Elena Criscuolo, Nicola Clementi, Nicasio Mancini, Rüdiger Groß, Alina Seidel, Lukas Wettstein, Jan Münch, Lorena Donnici, Matteo Conti, Raffaele De Francesco, Mirela Kuka, Gennaro Ciliberto, Concetta Castilletti, Maria Rosaria Capobianchi, Giuseppe Ippolito, Luca G. Guidotti, Lucio Rovati, Matteo Iannacone, and Luigi Aurisicchio**

**A**

Electroporated mice

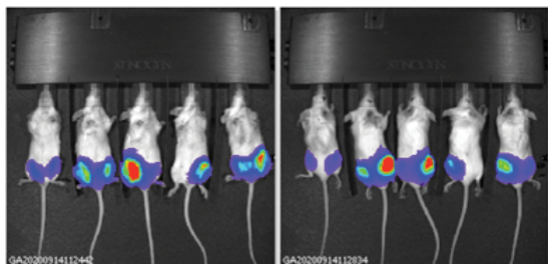

Not electroporated mice

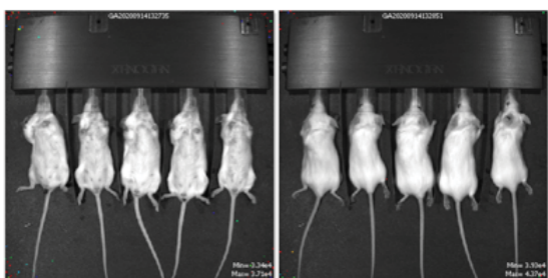**B**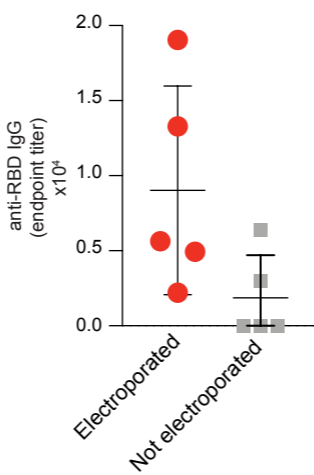

**A**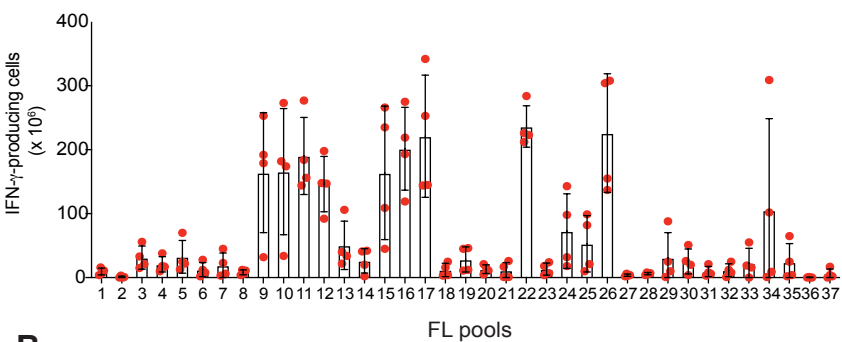**B**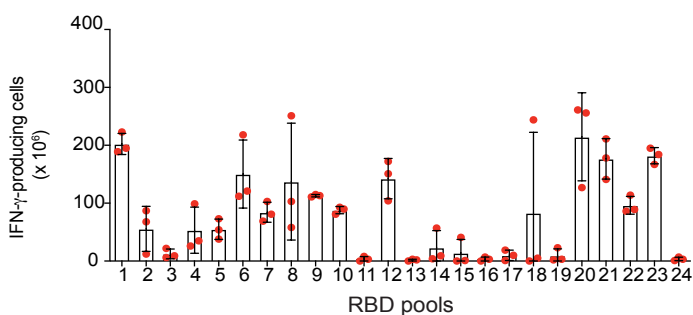**C**

| Peptide | Sequence         | Amino Acid |
|---------|------------------|------------|
| 69      | GAAAYVGYLQPRTF   | 261-275    |
| 70      | YYVGYLQPRTFLLKY  | 265-279    |
| 71      | YLQPRTFLLKYNENG  | 269-283    |
| 85      | QPTESIVRFPNITNL  | 321-335    |
| 93      | AWNKRKRISNCVADYS | 352-366    |
| 99      | STFKCYGVSPTKLND  | 375-389    |
| 100     | CYGVSPTKLNDLCFT  | 379-393    |
| 117     | VGGNYNYLRLFRKS   | 445-459    |
| 118     | NYNLYRLFRKSNLK   | 450-464    |
| 124     | IYQAGSTPCNGVEGF  | 472-486    |
| 128     | CYFPLQSYGFQPTNG  | 488-502    |
| 132     | VGYQPYRVVLSFEL   | 503-517    |
| 137     | HAPATVCGPKKSTNL  | 519-533    |
| 138     | TVCGPKKSTNLVKNK  | 523-537    |
| 139     | PKKSTNLVKNKCVNF  | 527-541    |

**A**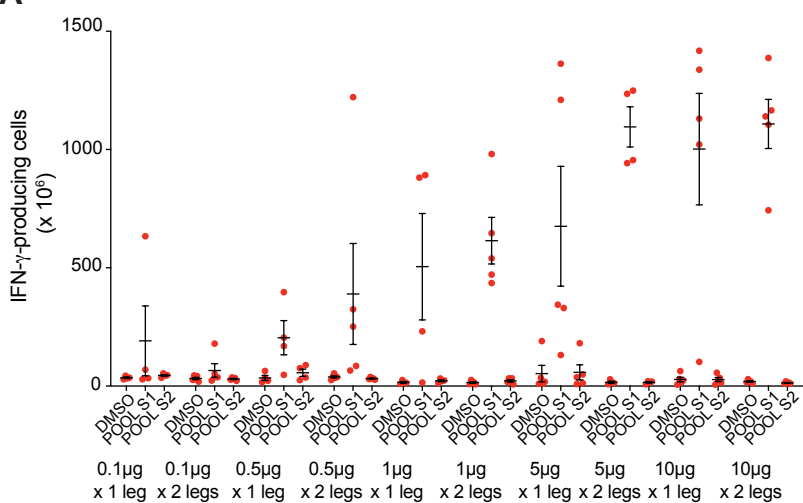**B**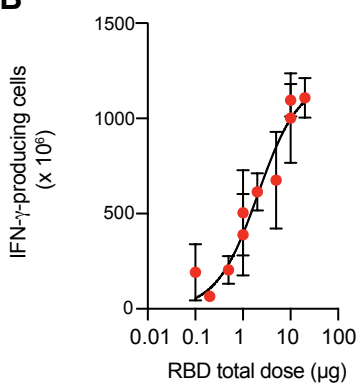**C**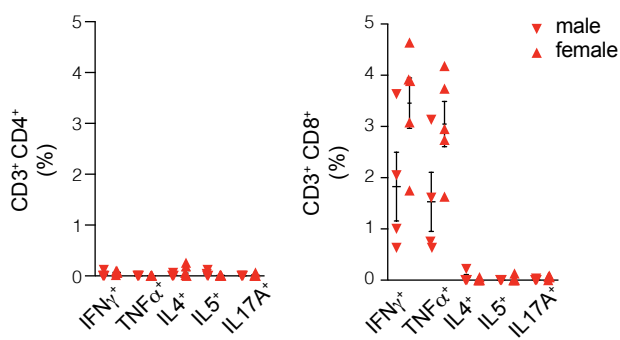

**A**

injection site: 2 days from EP + IM injection

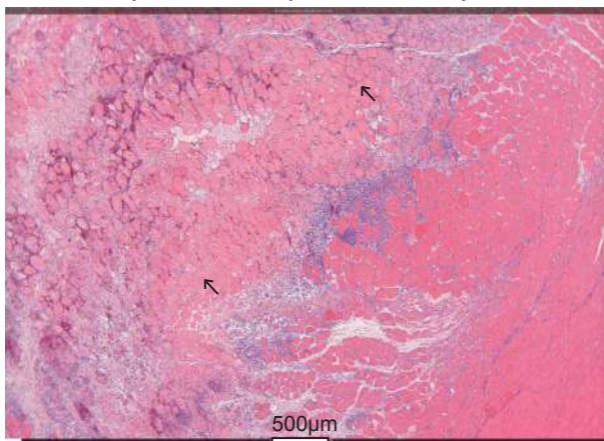**B**

injection site: 4 weeks from EP + IM injection

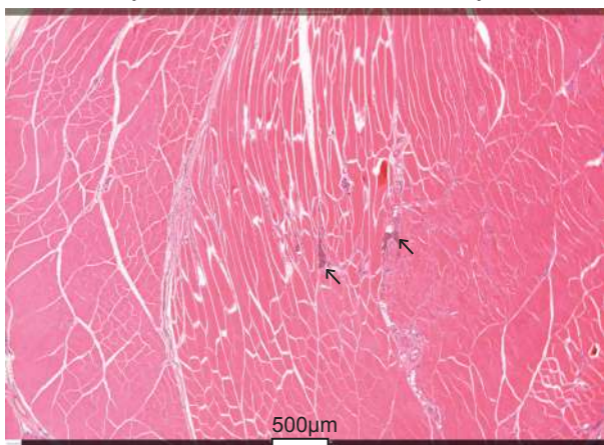

**A**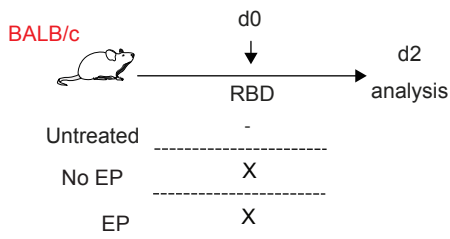**B**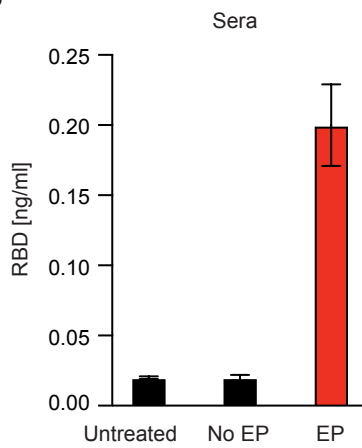**C**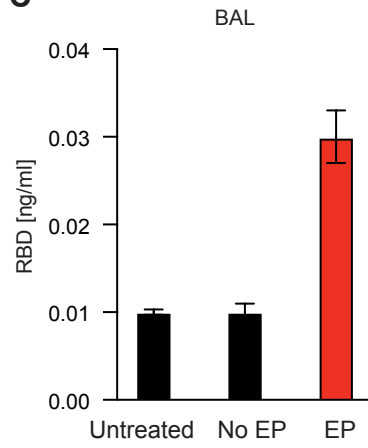**D**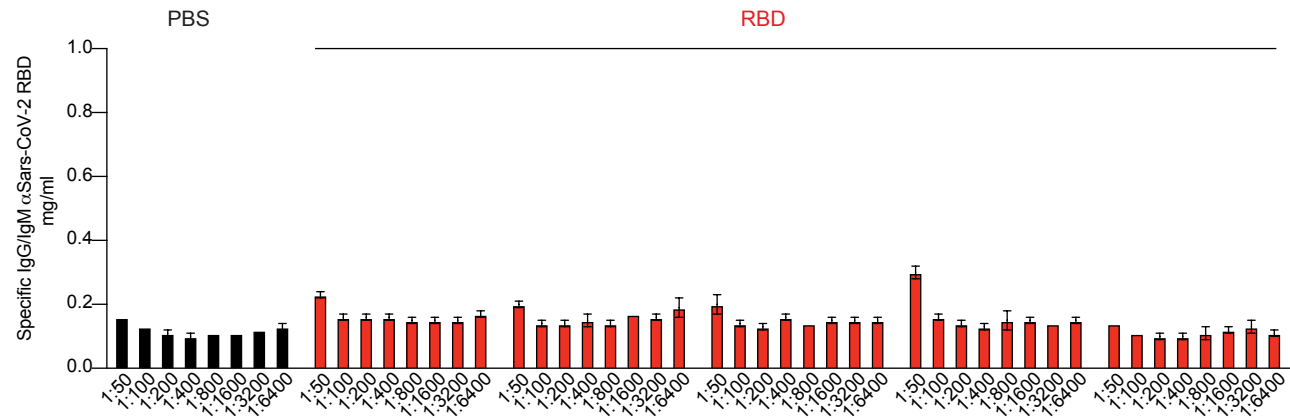**E**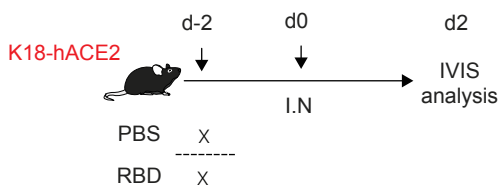**F**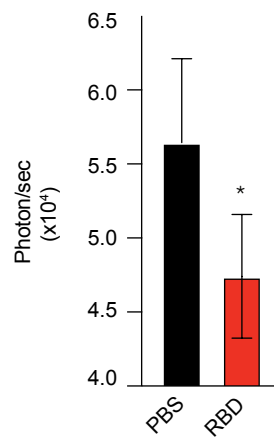

## Supplementary Figure Legends

### Supplementary Figure 1. *Electroporation increases the level of gene expression upon DNA immunization.* (A) BALB/c mice ( $n = 5$ ) were either injected i.m. with 1 mg

5 of a plasmid expressing firefly luciferase followed by electroporation (upper panel, electroporated mice) or not (lower panel, non-electroporated mice). Forty-eight hours later, optical imaging was carried out using an IVIS 200 system. Ventral and dorsal images were taken. (B) BALB/c mice were injected with 5 mg of RBD vaccine, with or without electroporation. 14 days later mice were bled, and anti-RBD IgG endpoint titers  
10 were measured by ELISA.

### Supplementary Figure 2. *T cell epitope mapping in RBD vaccinated mice.* (A-B)

IFN $\gamma$ <sup>+</sup> T cell response measured by ELISpot assay on splenocytes collected from FL or RBD-vaccinated BALB/c mice, following stimulation with matrix mapping FL or RBD  
15 peptide pools. (C) Schematic representation of the SARS-CoV-2 Spike protein and identification of immunodominant peptides in BALB/c mice.

### Supplementary Figure 3. *RBD-specific immune response in RBD vaccinated*

*C57BL/6 mouse model.* (A) IFN- $\gamma$ <sup>+</sup> T cell response measured by ELISpot assay on  
20 splenocytes collected at day 38 from C57BL/6 mice vaccinated with increasing doses of RBD vaccine (from 0.1 to 20  $\mu$ g, administered at one or two sites) and restimulated with Spike peptide pools S1 and S2. (B) Non-linear fitting curve of the dose-response against

RBD pool S1 peptides, measured by means of ELISpot assay performed on splenocytes from RBD-vaccinated C57BL/6 mice. **(C)** T cell characterization by intracellular staining on PBMCs collected from males and females vaccinated mice (administered dose: 5 $\mu$ g / leg).

5

**Supplementary Figure 4. Histopathological evaluation of electroporated tissues in**

**rat model. (A)** Histological section of the left injection site in a 400  $\mu$ g RBD-vaccinated

rat performed two days after the third and last DNA injection (i.e. day 30). Arrows

indicate the necrosis of muscle fibers, surrounded by inflammatory reaction (i.e.,

10 polymorphonuclear cells, mixed mononuclear cell infiltration, predominantly

macrophages). The cavities surrounded by the necrotic carbonized muscle fibers are

suggested to be related to the electroporation procedure. The lesions were mostly

scored as mild to moderate and were similar in all the groups. **(B)** Histological section of

the left injection site in a 400  $\mu$ g RBD vaccinated rat performed 4 weeks after third and

15 last DNA injection (i.e. day 57). Arrows indicate brownish pigmented muscle fibers,

probably related to a minimal chronic inflammation due to the electroporation procedure.

This image demonstrates a complete recovery of the injection site lesions at this stage,

in comparison to (A).

20 **Supplementary Figure 5. Assessment of secreted RBD in RBD vaccinated mice.**

**(A)** Schematic representation of the experimental setup. BALB/c mice were vaccinated

with 20  $\mu$ g of RBD vaccine, with or without electroporation, and 48 hours later the



secretion of RBD protein was assessed in sera and BALs. **(B)** Measurement of secreted RBD protein in sera from control mice and RBD vaccinated mice, with or without EP. **(C)** Measurement of secreted RBD protein in BALs from same groups of mice as in (B). **(D)** Measurement of anti-RBD antibodies in the sera at day 2 after RBD or PBS vaccination

5 **(E)** Schematic representation of the experimental setup. K18-hACE2 mice were vaccinated with 20 µg of RBD vaccine and 2 days later a lentiviral vector pseudotyped with the SARS-CoV-2 spike protein and encoding for luciferase RBD protein was intranasally administered. Two days later the lungs of treated mice were assessed for bioluminescence using an *in vivo* imaging system. **(F)** Comparison of bioluminescence

10 assessed by means of *in vivo* imaging system in control K18-hACE2 mice and K18-hACE2 RBD vaccinated mice. \* p value < 0.05

## Supplementary Table Legends

**Table S1.** *List of immunodominant B epitopes.*

5 **Table S2.** *Scheme of RBD peptide pool matrix.*

## Immunodominant B epitope list

| Peptide | Sequence         | Amino Acid |
|---------|------------------|------------|
| 5       | NLTTTRTQLPPAYTNS | 17-31      |
| 6       | RTQLPPAYTNSFTRG  | 21-35      |
| 22      | RFDNPVLPFNDGVYF  | 85-99      |
| 36      | CEFQFCNDPFLGVYY  | 141-155    |
| 37      | FCNDPFLGVYYHKNN  | 145-159    |
| 56      | INLVRDLPQGFSALE  | 221-235    |
| 57      | RDLPQGFSALEPLVD  | 225-239    |
| 76      | AVDCALDPLSETKCT  | 301-315    |
| 77      | ALDPLSETKCTLKSF  | 305-319    |
| 90      | VFNATRFASVYAWNR  | 357-371    |
| 92      | SVYAWNRKRISNCVA  | 365-379    |
| 120     | FRKSNLKPFERDIST  | 477-491    |
| 121     | NLKPFERDISTEIYQ  | 481-495    |
